# Supplementary material for: Differential Effects of Tra2ß Isoforms on HIV-1 RNA Processing and Expression
Source: PubMed Central journal article supplement (PMC4430212; doi:10.1371/journal.pone.0125315), 2015-05-13
Supplement: pone.0125315.s001.pdf [file pone.0125315.s001.pdf]

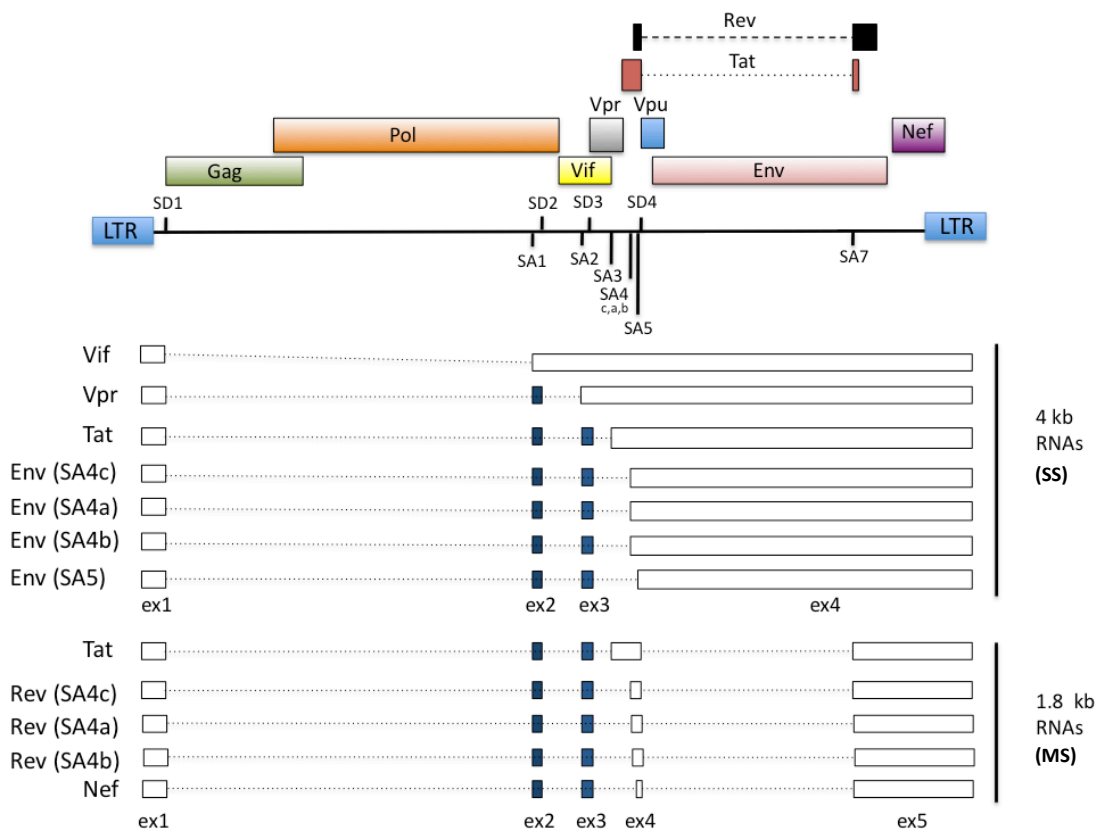

#### 4 kb SS RNA species

|      |                      |
|------|----------------------|
| vif  | ex1-ex4(SA1)         |
| vpr3 | ex1-ex4(SA2)         |
| vpr4 | ex1-ex2-ex4(SA2)     |
| tat5 | ex1-ex4(SA3)         |
| tat6 | ex1-ex2-ex4(SA3)     |
| tat7 | ex1-ex3-ex4(SA3)     |
| tat8 | ex1-ex2-ex3-ex4(SA3) |
| env1 | ex1-ex4(SA5)         |
| env2 | ex1-ex4(SA4b)        |
| env3 | ex1-ex4(SA4a)        |
| env4 | ex1-ex4(SA4c)        |
| env5 | ex1-ex2-ex4(SA5)     |
| env6 | ex1-ex2-ex4(SA4b)    |
| env7 | ex1-ex2-ex4(SA4a)    |
| env8 | ex1-ex3-ex4(SA5)     |
| env9 | ex1-ex2-ex4(SA4c)    |

#### 1.8 kb MS RNA species

|      |                          |
|------|--------------------------|
| tat1 | ex1-ex4(SA3)-ex5         |
| tat2 | ex1-ex2-ex4(SA3)-ex5     |
| tat3 | ex1-ex3-ex4(SA3)-ex5     |
| tat4 | ex1-ex2-ex3-ex4(SA3)-ex5 |
| rev1 | ex1-ex4(SA4b)-ex5        |
| rev2 | ex1-ex4(SA4a)-ex5        |
| rev3 | ex1-ex4(SA4c)-ex5        |
| rev4 | ex1-ex2-ex4(SA4b)-ex5    |
| rev5 | ex1-ex2-ex4(SA4a)-ex5    |
| rev6 | ex1-ex2-ex4(SA4c)-ex5    |
| rev7 | ex1-ex3-ex4(SA4b)-ex5    |
| rev8 | ex1-ex3-ex4(SA4a)-ex5    |
| rev9 | ex1-ex3-ex4(SA4c)-ex5    |
| nef1 | ex1-ex5                  |
| nef2 | ex1-ex4(SA5)-ex5         |
| nef3 | ex1-ex2-ex4(SA5)-ex5     |
| nef4 | ex1-ex3-ex4(SA5)-ex5     |
| nef5 | ex1-ex2-ex3-ex4(SA5)-ex5 |
| vpr1 | ex1-ex4(SA2)-ex5         |
| vpr2 | ex1-ex2-ex4(SA2)-ex5     |

Figure A

A

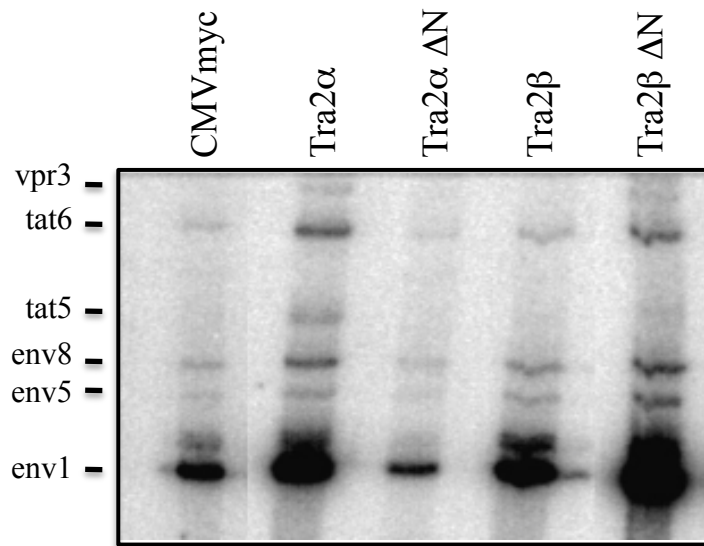

B

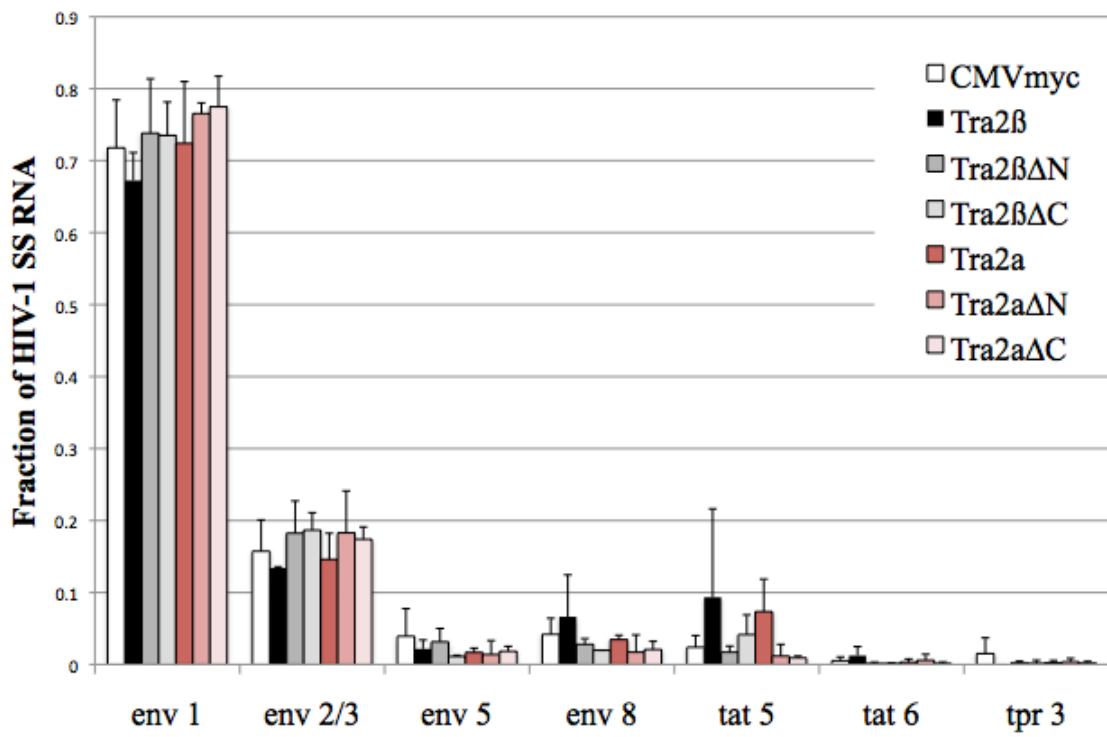

Figure B

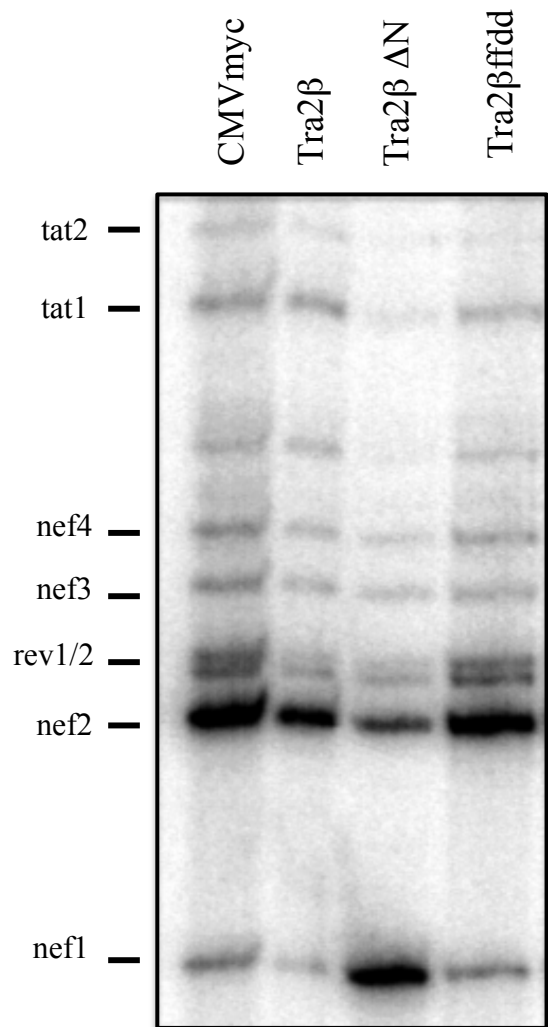

Figure C

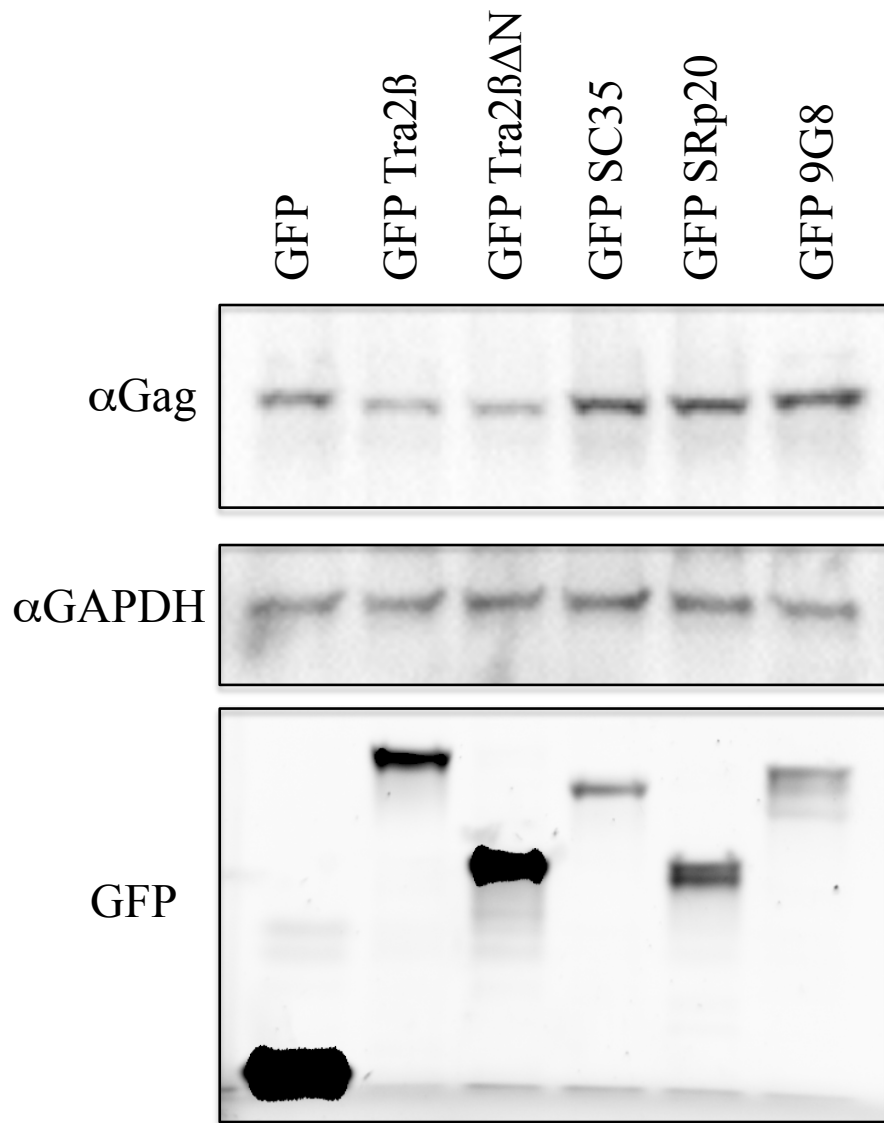

Figure D

A

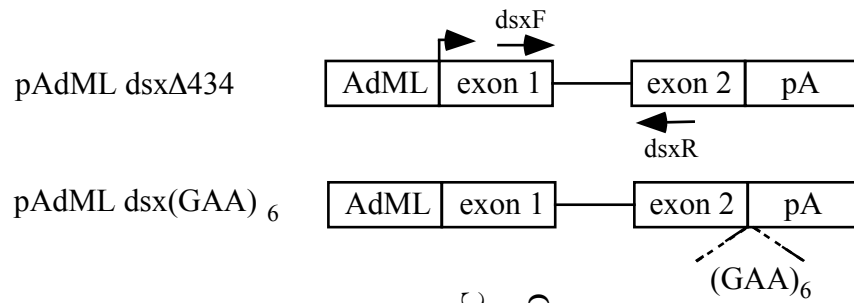

B

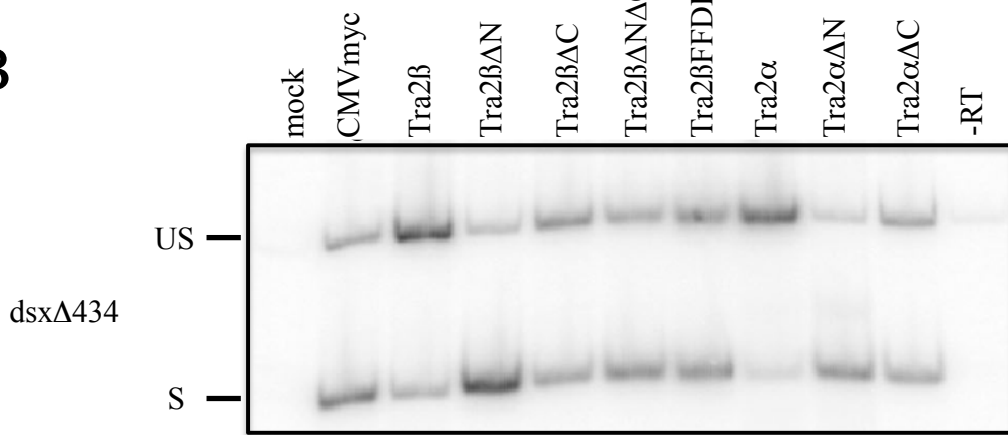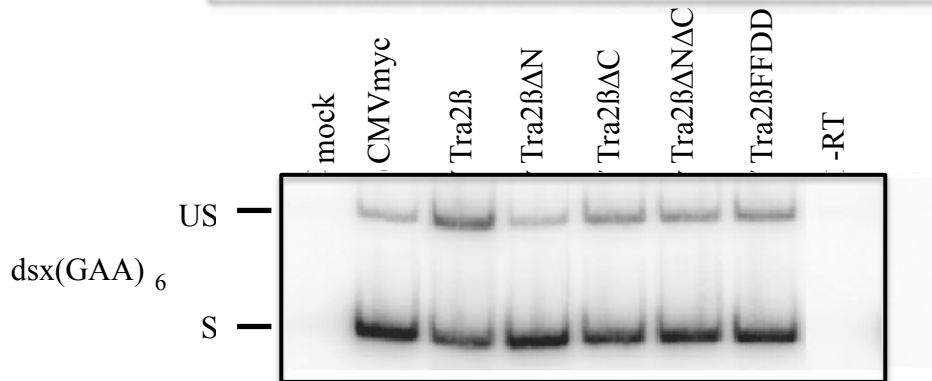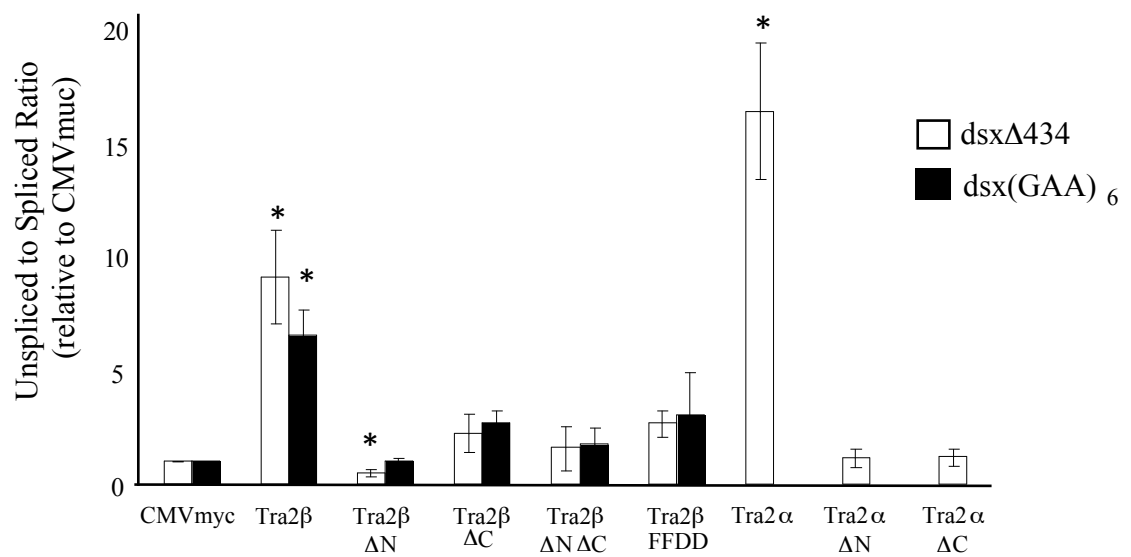

Figure E

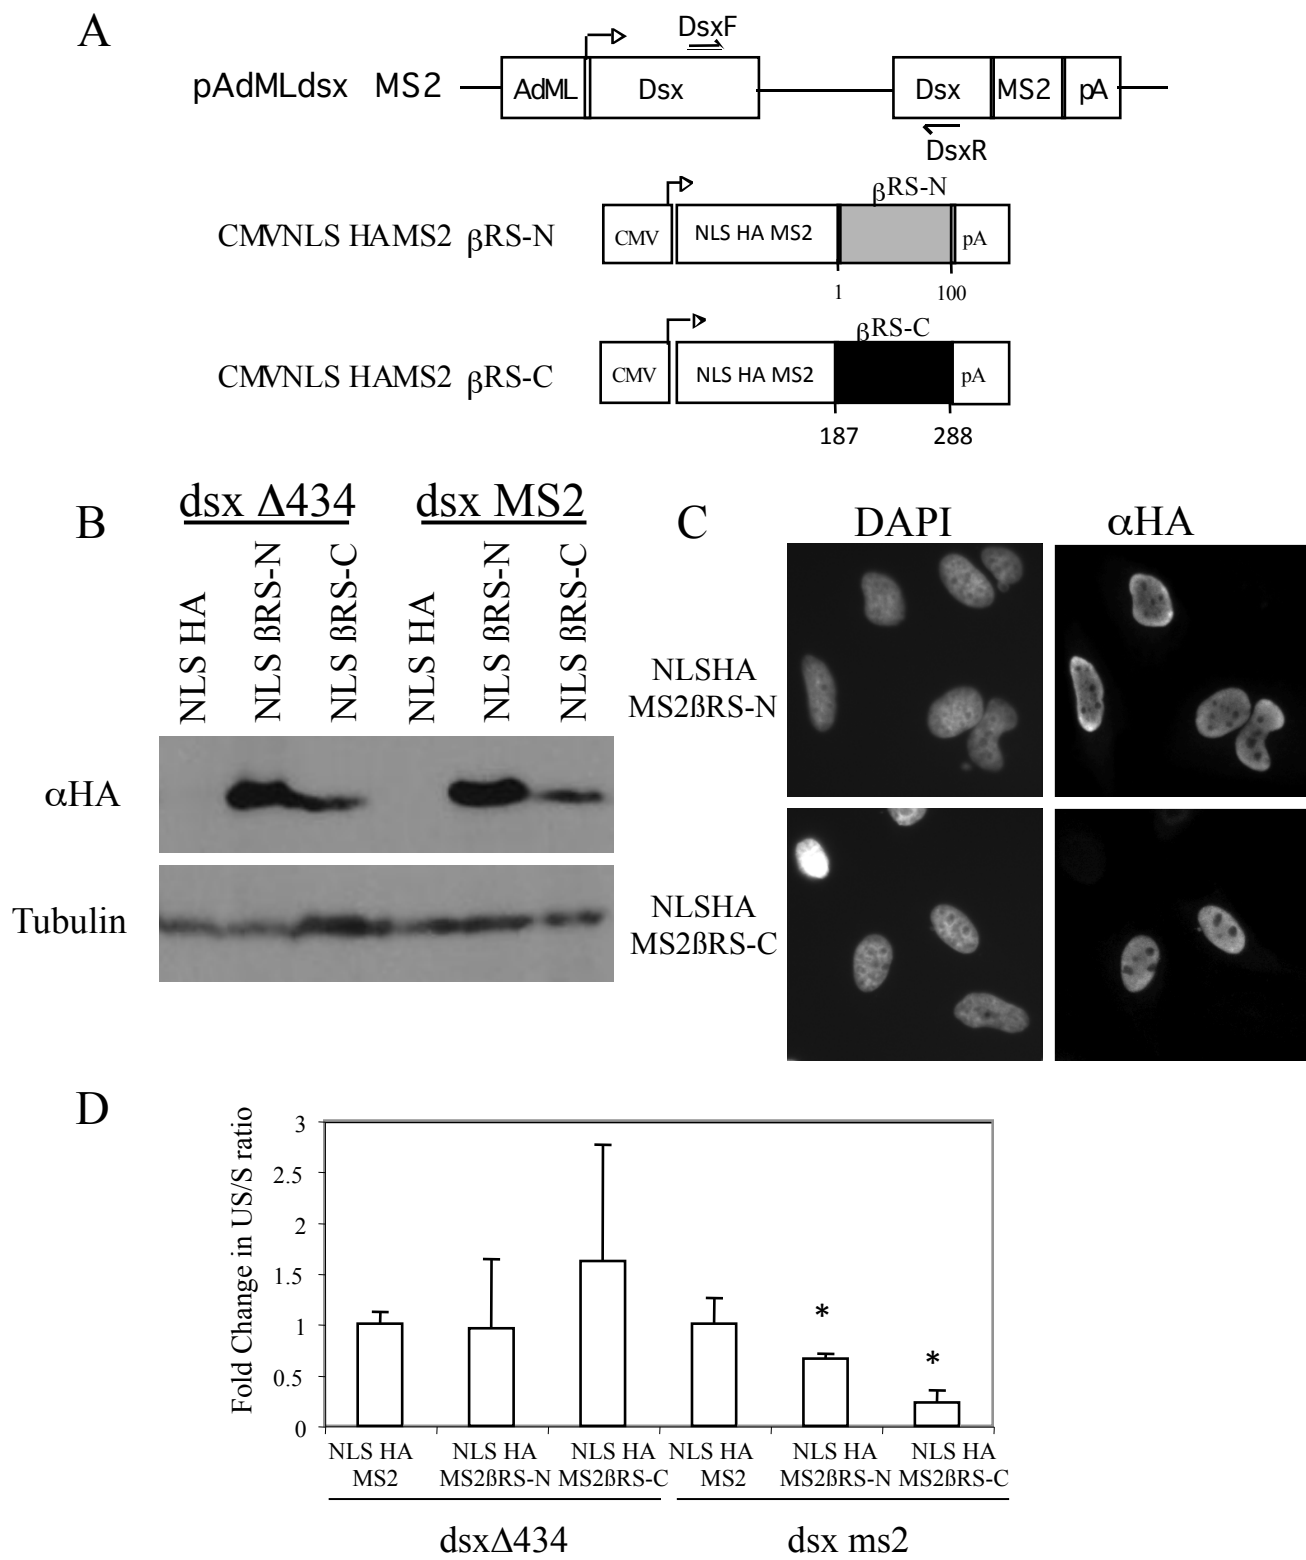

Figure F
